# Supplementary material
Source: Research Square preprint supplement (doi:10.21203/rs.3.rs-9242482/v1)
Supplement: Supplementary file 1 [file 4c8f06f8cf24534a7a488e44.docx]

**Supplementary materials**

**A phage-derived promoter SD13 enables strong and cross-host gene expression in *Streptomyces* and *Escherichia coli***

Nana Lu1*

1School of Marine and Biological Engineering, Yancheng Teachers University, Yancheng 224002, China

*Corresponding author

School of Marine and Biological Engineering, Yancheng Teachers University, Yancheng 224002, China. Email: lunn@yctu.edu.cn.


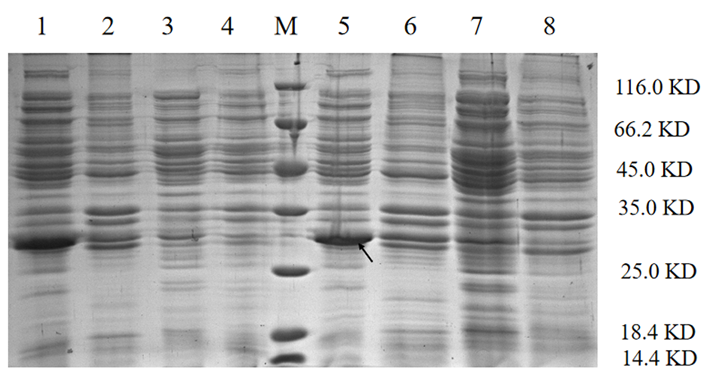


**Fig. S1** SDS-PAGE analysis of pIJ13-Endolysin recombinant plasmid expression in *E. coli* JM109. Lane 1: JM109/pIJ13-lysin, supernatant (8h); Lane 2: JM109/pIJ13-lysin, precipitates (8h); Lane 3: JM109/pIJ13, supernatant (8h); Lane 4: JM109/pIJ13, precipitates (8h); M: Standard protein marker；Lane 5: JM109/pIJ13-lysin, supernatant (10h); Lane 6: JM109/pIJ13-lysin, precipitates (10h); Lane 7: JM109/pIJ13, supernatant (10h); Lane8: JM109/pIJ13, precipitates (10h). The arrow indicates the band corresponding to the endolysin protein of bacteriophage phiSASD1.
